# Supplementary material for: The Phase Diagram of the API Benzocaine and Its Highly Persistent, Metastable Crystalline Polymorphs
Source: MDPI journal article supplement (doi:10.3390/pharmaceutics15051549), 2023-05-20
Supplement: s1 [file s1]

## SUPPLEMENTARY MATERIALS TO:

The phase diagram of the API Benzocaine and its highly persistent, metastable crystalline polymorphs

Ivo B. Rietveld, Hiroshi Akiba, Osamu Yamamuro, Maria Barrio, René Céolin, Josep-Lluís Tamarit

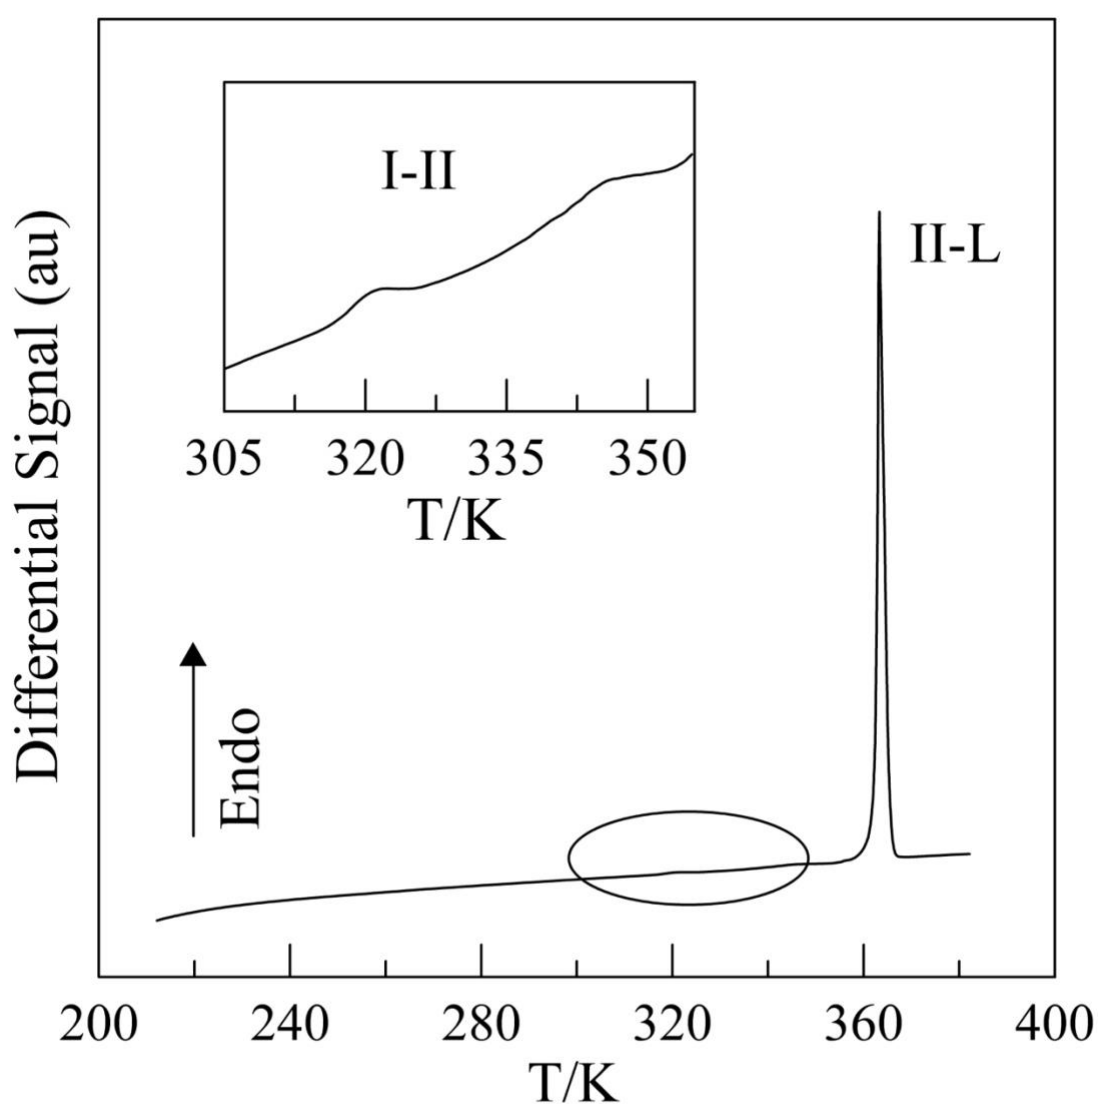

**Figure S1.** An example of the appearance of the I-II transition in a DSC measurement. Form I loaded into the capsule often leads to two small peaks after which the melting peak of form II is observed.

**Table S1. Unit-cell parameters of form I ( $P2_1/c$ ,  $Z = 4$ ) as a function of temperature <sup>a</sup>**

| $T / K$ | $a(\sigma) / \text{\AA}$ | $b(\sigma) / \text{\AA}$ | $c(\sigma) / \text{\AA}$ | $\beta(\sigma) / ^\circ$ | $V(\sigma) / \text{\AA}^3$ | $V/Z / \text{\AA}^3$ | $\nu / \text{cm}^3\text{g}^{-1}$ |
|---------|--------------------------|--------------------------|--------------------------|--------------------------|----------------------------|----------------------|----------------------------------|
| 120     | 8.2001(4)                | 5.4400(4)                | 19.6206(12)              | 91.297(4)                | 874.90(9)                  | 218.72               | 0.79736                          |
| 170     | 8.2130(5)                | 5.4509(4)                | 19.6913(10)              | 91.449(4)                | 881.26(9)                  | 220.31               | 0.80315                          |
| 200     | 8.2243(6)                | 5.4641(4)                | 19.7493(12)              | 91.555(6)                | 887.17(11)                 | 221.79               | 0.80855                          |
| 225     | 8.2253(5)                | 5.4711(4)                | 19.7913(10)              | 91.594(5)                | 890.29(10)                 | 222.57               | 0.81139                          |
| 250     | 8.2419(5)                | 5.4839(4)                | 19.8494(11)              | 91.658(4)                | 896.77(10)                 | 224.19               | 0.81729                          |
| 275     | 8.2483(5)                | 5.4935(4)                | 19.9059(11)              | 91.696(4)                | 901.57(9)                  | 225.39               | 0.82167                          |
| 293     | 8.2562(5)                | 5.5028(3)                | 19.9572(10)              | 91.743(4)                | 906.27(9)                  | 226.57               | 0.82595                          |
| 310     | 8.2594(6)                | 5.5094(4)                | 19.9962(12)              | 91.745(5)                | 909.49(11)                 | 227.37               | 0.82889                          |
| 320     | 8.2638(5)                | 5.5155(4)                | 20.0254(12)              | 91.729(5)                | 912.32(11)                 | 228.08               | 0.83147                          |

<sup>a</sup> ( $\sigma$ ) standard deviation in the last digit**Table S2. Unit-cell parameters of form II ( $P2_12_12_1$ ,  $Z = 4$ ) as a function of temperature <sup>a</sup>**

| $T / K$ | $a(\sigma) / \text{\AA}$ | $b(\sigma) / \text{\AA}$ | $c(\sigma) / \text{\AA}$ | $V(\sigma) / \text{\AA}^3$ | $V/Z / \text{\AA}^3$ | $\nu / \text{cm}^3\text{g}^{-1}$ |
|---------|--------------------------|--------------------------|--------------------------|----------------------------|----------------------|----------------------------------|
| 250     | 8.2255(10)               | 5.2848(6)                | 20.8098(22)              | 904.61(18)                 | 226.15               | 0.82444                          |
| 260     | 8.2237(10)               | 5.283(6)                 | 20.8289(21)              | 906.00(17)                 | 226.50               | 0.82571                          |
| 270     | 8.2306(8)                | 5.2964(5)                | 20.8431(19)              | 908.61(15)                 | 227.15               | 0.82809                          |
| 280     | 8.2332(9)                | 5.3015(5)                | 20.855(2)                | 910.28(16)                 | 227.57               | 0.82961                          |
| 290     | 8.2375(8)                | 5.3074(6)                | 20.8703(18)              | 912.43(15)                 | 228.11               | 0.83156                          |
| 300     | 8.2412(12)               | 5.3128(5)                | 20.888(3)                | 914.6(2)                   | 228.64               | 0.83350                          |
| 320     | 8.2497(10)               | 5.3244(6)                | 20.933(2)                | 919.46(18)                 | 229.87               | 0.83797                          |
| 330     | 8.2530(10)               | 5.3306(6)                | 20.961(2)                | 922.14(18)                 | 230.53               | 0.84041                          |
| 335     | 8.2501(15)               | 5.3315(10)               | 20.936(4)                | 920.9(3)                   | 230.22               | 0.83928                          |
| 340     | 8.2570(15)               | 5.3373(9)                | 20.966(3)                | 924.0(3)                   | 230.99               | 0.84209                          |
| 345     | 8.2671(6)                | 5.3464(4)                | 21.0205(12)              | 929.08(11)                 | 232.27               | 0.84674                          |
| 350     | 8.2610(10)               | 5.3427(6)                | 21.018(21)               | 927.64(18)                 | 231.91               | 0.84543                          |
| 355     | 8.2639(9)                | 5.3448(6)                | 21.040(2)                | 929.32(17)                 | 232.33               | 0.84696                          |

<sup>a</sup> ( $\sigma$ ) standard deviation in the last digit(s)

**Table S3. Unit-cell parameters of form III ( $P2_1$ ,  $Z = 8$ ) as a function of temperature <sup>a</sup>**

| $T / K$ | $a(\sigma) / \text{\AA}$ | $b(\sigma) / \text{\AA}$ | $c(\sigma) / \text{\AA}$ | $\gamma(\sigma) / ^\circ$ | $V(\sigma) / \text{\AA}^3$ | $V/Z / \text{\AA}^3$ | $\nu / \text{cm}^3\text{g}^{-1}$ |
|---------|--------------------------|--------------------------|--------------------------|---------------------------|----------------------------|----------------------|----------------------------------|
| 120     | 8.1908(9)                | 10.6294(11)              | 20.4674(19)              | 99.349(9)                 | 1758.3(3)                  | 219.79               | 0.80123                          |
| 170     | 8.2021(10)               | 10.6653(11)              | 20.5263(19)              | 99.404(9)                 | 1771.5(4)                  | 221.43               | 0.80723                          |
| 200     | 8.2090(10)               | 10.6900(10)              | 20.5656(18)              | 99.416(10)                | 1780.4(3)                  | 222.55               | 0.81130                          |
| 220     | 8.2173(10)               | 10.7125(11)              | 20.602(2)                | 99.414(9)                 | 1789.1(4)                  | 223.64               | 0.81526                          |
| 230     | 8.2212(10)               | 10.7202(11)              | 20.622(3)                | 99.412(10)                | 1793.0(4)                  | 224.13               | 0.81706                          |
| 240     | 8.2228(10)               | 10.7290(11)              | 20.639(3)                | 99.388(10)                | 1796.4(4)                  | 224.55               | 0.81860                          |
| 250     | 8.2323(10)               | 10.7445(11)              | 20.668(3)                | 99.402(9)                 | 1803.5(4)                  | 225.44               | 0.82185                          |
| 260     | 8.2313(19)               | 10.747(2)                | 20.698(3)                | 99.447(15)                | 1806.2(6)                  | 225.77               | 0.82306                          |
| 245     | 8.2284(10)               | 10.7392(12)              | 20.654(3)                | 99.399(9)                 | 1800.6(4)                  | 225.08               | 0.82051                          |
| 255     | 8.2302(12)               | 10.7493(13)              | 20.680(3)                | 99.413(10)                | 1804.9(4)                  | 225.61               | 0.82246                          |

<sup>a</sup> ( $\sigma$ ) standard deviation in the last digit(s)

**Table S4. Heat capacity of benzocaine forms I, II, and III as a function of temperature obtained by adiabatic calorimetry.<sup>a</sup> Transition peaks are marked with yellow background.**

| Form I – form II (stable) |                                       | Form III (metastable) – form II - melt |                                       |
|---------------------------|---------------------------------------|----------------------------------------|---------------------------------------|
| $T / K$                   | $C_p / \text{Jmol}^{-1}\text{K}^{-1}$ | $T / K$                                | $C_p / \text{Jmol}^{-1}\text{K}^{-1}$ |
| 0                         | 0 <sup>b</sup>                        | 0                                      | 0 <sup>c</sup>                        |
| 1.000                     | 0.274 <sup>b</sup>                    | 1.000                                  | 0.285 <sup>c</sup>                    |
| 2.000                     | 0.556 <sup>b</sup>                    | 2.000                                  | 0.577 <sup>c</sup>                    |
| 3.000                     | 0.851 <sup>b</sup>                    | 3.000                                  | 0.884 <sup>c</sup>                    |
| 4.000                     | 1.167 <sup>b</sup>                    | 4.000                                  | 1.213 <sup>c</sup>                    |
| 5.000                     | 1.510 <sup>b</sup>                    | 5.000                                  | 1.571 <sup>c</sup>                    |
| 6.000                     | 1.887 <sup>b</sup>                    | 6.000                                  | 1.966 <sup>c</sup>                    |
| 7.000                     | 2.306 <sup>b</sup>                    | 7.000                                  | 2.404 <sup>c</sup>                    |
| 8.000                     | 2.774 <sup>b</sup>                    | 8.000                                  | 2.894 <sup>c</sup>                    |
| 9.000                     | 3.296 <sup>b</sup>                    | 9.000                                  | 3.441 <sup>c</sup>                    |
| 10.000                    | 3.880 <sup>b</sup>                    | 10.000                                 | 4.055 <sup>c</sup>                    |
| 11.000                    | 4.533 <sup>b</sup>                    | 11.000                                 | 4.741 <sup>c</sup>                    |
| 12.000                    | 5.262 <sup>b</sup>                    | 11.382                                 | 4.747                                 |
| 12.588                    | 5.656                                 | 13.512                                 | 6.848                                 |
| 13.940                    | 6.770                                 | 15.210                                 | 8.749                                 |
| 15.153                    | 8.142                                 | 16.671                                 | 10.581                                |
| 16.256                    | 9.534                                 | 17.975                                 | 12.279                                |
| 17.335                    | 10.907                                | 19.168                                 | 13.755                                |
| 18.454                    | 12.279                                | 20.279                                 | 15.392                                |
| 19.281                    | 13.304                                | 21.327                                 | 16.734                                |
| 20.274                    | 14.595                                | 22.336                                 | 18.022                                |
| 21.239                    | 15.833                                | 23.313                                 | 19.336                                |
| 22.180                    | 17.063                                | 24.266                                 | 20.730                                |
| 23.100                    | 18.353                                | 25.230                                 | 21.990                                |
| 24.345                    | 20.356                                | 26.231                                 | 23.219                                |

|               |        |               |        |
|---------------|--------|---------------|--------|
| <b>25.827</b> | 22.352 | <b>27.255</b> | 24.409 |
| <b>27.341</b> | 24.167 | <b>28.277</b> | 25.652 |
| <b>28.876</b> | 26.485 | <b>29.245</b> | 27.405 |
| <b>30.536</b> | 28.701 | <b>31.224</b> | 29.330 |
| <b>32.202</b> | 30.525 | <b>32.239</b> | 30.692 |
| <b>33.776</b> | 32.760 | <b>33.355</b> | 32.257 |
| <b>35.371</b> | 34.752 | <b>34.524</b> | 33.851 |
| <b>36.991</b> | 36.714 | <b>35.673</b> | 35.300 |
| <b>38.636</b> | 38.810 | <b>36.876</b> | 36.741 |
| <b>40.308</b> | 40.883 | <b>38.195</b> | 38.352 |
| <b>41.906</b> | 42.762 | <b>39.620</b> | 40.110 |
| <b>43.462</b> | 44.561 | <b>41.143</b> | 41.950 |
| <b>45.005</b> | 46.206 | <b>42.694</b> | 43.772 |
| <b>46.524</b> | 47.900 | <b>44.212</b> | 45.401 |
| <b>48.026</b> | 49.468 | <b>45.706</b> | 47.001 |
| <b>49.514</b> | 51.158 | <b>47.181</b> | 48.603 |
| <b>50.986</b> | 52.706 | <b>48.680</b> | 50.230 |
| <b>52.437</b> | 54.260 | <b>50.199</b> | 51.908 |
| <b>53.870</b> | 55.640 | <b>51.691</b> | 53.123 |
| <b>55.289</b> | 57.021 | <b>53.158</b> | 55.164 |
| <b>56.695</b> | 58.060 | <b>54.609</b> | 56.204 |
| <b>58.090</b> | 60.128 | <b>56.046</b> | 57.622 |
| <b>59.476</b> | 60.805 | <b>57.469</b> | 59.005 |
| <b>60.857</b> | 62.227 | <b>58.881</b> | 60.309 |
| <b>62.233</b> | 63.559 | <b>60.283</b> | 61.617 |
| <b>63.604</b> | 64.795 | <b>61.678</b> | 62.912 |
| <b>64.972</b> | 66.083 | <b>63.068</b> | 63.951 |
| <b>66.337</b> | 67.371 | <b>64.451</b> | 65.861 |
| <b>67.701</b> | 68.516 | <b>65.832</b> | 66.622 |
| <b>69.065</b> | 69.658 | <b>67.211</b> | 67.104 |
| <b>70.680</b> | 70.975 | <b>68.529</b> | 69.104 |
| <b>72.028</b> | 72.067 | <b>69.907</b> | 70.406 |
| <b>73.378</b> | 72.873 | <b>71.284</b> | 71.227 |
| <b>74.731</b> | 74.676 | <b>72.663</b> | 72.423 |
| <b>76.087</b> | 75.296 | <b>74.043</b> | 73.480 |
| <b>77.448</b> | 76.377 | <b>75.424</b> | 74.530 |
| <b>78.812</b> | 76.644 | <b>76.808</b> | 75.670 |
| <b>80.181</b> | 78.252 | <b>78.195</b> | 76.818 |
| <b>81.554</b> | 79.527 | <b>79.585</b> | 77.754 |
| <b>82.932</b> | 80.274 | <b>80.978</b> | 78.831 |
| <b>84.316</b> | 81.611 | <b>82.377</b> | 79.958 |
| <b>85.705</b> | 83.011 | <b>83.779</b> | 80.981 |
| <b>87.100</b> | 83.825 | <b>85.187</b> | 82.113 |

|                |         |                |         |
|----------------|---------|----------------|---------|
| <b>88.504</b>  | 84.646  | <b>86.599</b>  | 83.044  |
| <b>90.077</b>  | 86.099  | <b>87.600</b>  | 83.828  |
| <b>91.654</b>  | 87.202  | <b>89.161</b>  | 85.089  |
| <b>93.234</b>  | 88.252  | <b>90.725</b>  | 86.081  |
| <b>94.819</b>  | 89.437  | <b>92.292</b>  | 87.543  |
| <b>96.407</b>  | 90.639  | <b>93.863</b>  | 88.555  |
| <b>98.001</b>  | 91.844  | <b>95.439</b>  | 89.707  |
| <b>99.600</b>  | 92.975  | <b>97.020</b>  | 90.846  |
| <b>101.205</b> | 94.338  | <b>98.606</b>  | 92.027  |
| <b>102.815</b> | 95.367  | <b>100.198</b> | 92.976  |
| <b>104.432</b> | 96.535  | <b>101.796</b> | 94.339  |
| <b>106.055</b> | 97.617  | <b>103.399</b> | 95.369  |
| <b>107.686</b> | 98.746  | <b>105.010</b> | 96.650  |
| <b>109.323</b> | 99.910  | <b>106.628</b> | 97.799  |
| <b>110.968</b> | 101.234 | <b>108.252</b> | 98.996  |
| <b>112.621</b> | 102.190 | <b>109.885</b> | 100.247 |
| <b>114.281</b> | 103.421 | <b>111.525</b> | 101.212 |
| <b>115.951</b> | 104.256 | <b>113.172</b> | 102.323 |
| <b>117.628</b> | 105.528 | <b>114.829</b> | 103.455 |
| <b>119.314</b> | 106.809 | <b>116.493</b> | 104.482 |
| <b>121.008</b> | 107.623 | <b>118.166</b> | 105.601 |
| <b>122.712</b> | 108.910 | <b>119.848</b> | 106.897 |
| <b>124.425</b> | 110.003 | <b>121.539</b> | 107.821 |
| <b>126.147</b> | 111.178 | <b>123.238</b> | 109.022 |
| <b>127.879</b> | 112.335 | <b>124.947</b> | 110.102 |
| <b>129.620</b> | 113.338 | <b>126.666</b> | 111.302 |
| <b>131.371</b> | 114.208 | <b>128.394</b> | 112.438 |
| <b>133.132</b> | 115.714 | <b>130.132</b> | 113.526 |
| <b>134.902</b> | 117.052 | <b>131.880</b> | 115.000 |
| <b>136.683</b> | 118.219 | <b>133.637</b> | 115.956 |
| <b>138.474</b> | 118.707 | <b>135.405</b> | 117.075 |
| <b>140.275</b> | 120.343 | <b>137.182</b> | 118.265 |
| <b>142.087</b> | 121.613 | <b>138.971</b> | 119.158 |
| <b>143.909</b> | 122.912 | <b>140.770</b> | 120.541 |
| <b>145.741</b> | 124.434 | <b>142.579</b> | 121.740 |
| <b>147.586</b> | 125.335 | <b>144.398</b> | 123.011 |
| <b>149.439</b> | 126.982 | <b>146.229</b> | 124.283 |
| <b>151.304</b> | 127.530 | <b>148.070</b> | 125.831 |
| <b>153.180</b> | 128.682 | <b>149.922</b> | 126.466 |
| <b>155.066</b> | 130.424 | <b>151.785</b> | 127.846 |
| <b>156.965</b> | 131.287 | <b>153.659</b> | 128.890 |
| <b>158.874</b> | 132.606 | <b>155.544</b> | 129.832 |
| <b>160.794</b> | 133.631 | <b>157.440</b> | 131.084 |

|                |         |                |         |
|----------------|---------|----------------|---------|
| <b>162.726</b> | 134.875 | <b>159.280</b> | 132.767 |
| <b>164.669</b> | 136.019 | <b>161.199</b> | 133.705 |
| <b>166.624</b> | 137.874 | <b>163.129</b> | 134.720 |
| <b>168.590</b> | 138.878 | <b>165.070</b> | 136.180 |
| <b>170.567</b> | 140.138 | <b>167.024</b> | 136.503 |
| <b>172.555</b> | 141.925 | <b>168.982</b> | 138.527 |
| <b>174.556</b> | 143.043 | <b>170.947</b> | 140.028 |
| <b>176.577</b> | 144.191 | <b>172.933</b> | 141.278 |
| <b>178.624</b> | 145.208 | <b>174.939</b> | 142.381 |
| <b>180.690</b> | 147.046 | <b>176.965</b> | 143.623 |
| <b>182.777</b> | 147.561 | <b>179.011</b> | 145.058 |
| <b>184.883</b> | 149.615 | <b>181.077</b> | 146.240 |
| <b>187.008</b> | 151.038 | <b>183.162</b> | 147.522 |
| <b>189.153</b> | 152.160 | <b>185.267</b> | 149.349 |
| <b>191.317</b> | 153.694 | <b>187.392</b> | 149.584 |
| <b>193.503</b> | 155.046 | <b>189.537</b> | 151.756 |
| <b>195.705</b> | 156.620 | <b>191.700</b> | 153.108 |
| <b>197.928</b> | 158.142 | <b>193.883</b> | 154.713 |
| <b>200.169</b> | 159.873 | <b>196.086</b> | 156.118 |
| <b>202.432</b> | 160.958 | <b>198.308</b> | 157.479 |
| <b>204.712</b> | 162.960 | <b>200.549</b> | 159.306 |
| <b>207.011</b> | 164.760 | <b>202.810</b> | 160.905 |
| <b>209.330</b> | 165.289 | <b>205.090</b> | 161.248 |
| <b>211.669</b> | 168.344 | <b>207.391</b> | 164.085 |
| <b>214.025</b> | 169.577 | <b>209.708</b> | 165.366 |
| <b>216.401</b> | 171.843 | <b>212.046</b> | 166.999 |
| <b>218.797</b> | 173.051 | <b>214.402</b> | 168.727 |
| <b>221.210</b> | 174.634 | <b>216.777</b> | 170.532 |
| <b>223.642</b> | 176.325 | <b>219.172</b> | 171.619 |
| <b>226.094</b> | 176.777 | <b>221.587</b> | 174.468 |
| <b>228.564</b> | 180.441 | <b>224.019</b> | 175.482 |
| <b>231.052</b> | 182.043 | <b>226.469</b> | 177.238 |
| <b>233.558</b> | 184.642 | <b>228.939</b> | 179.002 |
| <b>236.085</b> | 184.439 | <b>231.426</b> | 181.817 |
| <b>238.629</b> | 187.259 | <b>233.936</b> | 182.946 |
| <b>241.190</b> | 189.245 | <b>236.461</b> | 184.675 |
| <b>243.770</b> | 192.210 | <b>239.005</b> | 186.341 |
| <b>246.372</b> | 193.224 | <b>241.567</b> | 188.367 |
| <b>248.988</b> | 195.119 | <b>244.148</b> | 190.231 |
| <b>251.623</b> | 196.947 | <b>246.746</b> | 193.533 |
| <b>254.277</b> | 196.949 | <b>249.367</b> | 193.623 |
| <b>256.950</b> | 201.468 | <b>251.669</b> | 195.901 |
| <b>259.638</b> | 203.188 | <b>253.651</b> | 197.227 |

|                |         |                |           |
|----------------|---------|----------------|-----------|
| <b>262.345</b> | 204.906 | <b>255.641</b> | 198.931   |
| <b>265.070</b> | 207.168 | <b>257.641</b> | 200.612   |
| <b>267.814</b> | 207.126 | <b>259.648</b> | 202.643   |
| <b>270.576</b> | 212.165 | <b>261.663</b> | 206.527   |
| <b>273.352</b> | 215.573 | <b>263.681</b> | 218.256   |
| <b>276.147</b> | 216.279 | <b>265.695</b> | 238.330   |
| <b>278.960</b> | 218.560 | <b>267.664</b> | 353.318   |
| <b>281.791</b> | 220.905 | <b>269.632</b> | 251.630   |
| <b>284.638</b> | 225.065 | <b>271.673</b> | 213.196   |
| <b>287.508</b> | 224.720 | <b>273.740</b> | 215.803   |
| <b>290.391</b> | 228.455 | <b>275.815</b> | 215.157   |
| <b>291.471</b> | 230.283 | <b>278.731</b> | 221.728   |
| <b>294.408</b> | 232.735 | <b>280.841</b> | 220.199   |
| <b>297.396</b> | 235.423 | <b>282.967</b> | 223.502   |
| <b>300.413</b> | 234.870 | <b>285.113</b> | 225.344   |
| <b>303.457</b> | 241.403 | <b>287.278</b> | 227.454   |
| <b>306.518</b> | 244.248 | <b>289.400</b> | 229.619   |
| <b>309.601</b> | 253.014 | <b>292.211</b> | 232.245   |
| <b>312.702</b> | 264.798 | <b>295.047</b> | 235.225   |
| <b>315.816</b> | 276.471 | <b>297.909</b> | 237.553   |
| <b>318.915</b> | 333.731 | <b>300.796</b> | 238.982   |
| <b>321.998</b> | 334.508 | <b>303.708</b> | 242.781   |
| <b>325.127</b> | 276.204 | <b>306.645</b> | 246.056   |
| <b>328.308</b> | 266.738 | <b>309.605</b> | 249.168   |
| <b>331.500</b> | 271.201 | <b>312.590</b> | 252.397   |
| <b>334.699</b> | 274.121 | <b>315.599</b> | 255.699   |
| <b>337.907</b> | 278.116 | <b>318.633</b> | 258.480   |
| <b>341.122</b> | 282.803 | <b>321.691</b> | 261.323   |
| <b>344.342</b> | 290.261 | <b>324.772</b> | 264.222   |
|                |         | <b>327.878</b> | 267.234   |
|                |         | <b>331.400</b> | 270.478   |
|                |         | <b>334.214</b> | 273.477   |
|                |         | <b>337.037</b> | 276.667   |
|                |         | <b>339.869</b> | 280.254   |
|                |         | <b>342.708</b> | 285.663   |
|                |         | <b>345.552</b> | 294.049   |
|                |         | <b>348.396</b> | 307.854   |
|                |         | <b>351.230</b> | 335.052   |
|                |         | <b>354.026</b> | 398.251   |
|                |         | <b>356.714</b> | 576.973   |
|                |         | <b>359.084</b> | 1228.500  |
|                |         | <b>360.753</b> | 3957.290  |
|                |         | <b>361.611</b> | 12550.000 |

|  |                |           |
|--|----------------|-----------|
|  | <b>362.028</b> | 21454.200 |
|  | <b>363.391</b> | 892.051   |
|  | <b>366.057</b> | 336.660   |
|  | <b>368.989</b> | 336.885   |

<sup>a</sup> Uncertainty in last digit

<sup>b</sup> Data obtained by extrapolation with equation S1.

<sup>c</sup> Data obtained by extrapolation with equation S2.

## EXTRAPOLATION TO 0K

Form I

$$C_{p,I} = 0.2732 T + 1.147 \times 10^{-3} T^3 \quad R^2 = 0.997 \quad (S1)$$

Form II

$$C_{p,II} = 0.2837 T + 1.217 \times 10^{-3} T^3 \quad R^2 = 0.996 \quad (S2)$$

**Table S5. Temperature-pressure data of the I-II, I-I, and II-I equilibria**

| Transition I-II |        | Fusion II-I   |        | Fusion I-I    |        |
|-----------------|--------|---------------|--------|---------------|--------|
| T /K            | P /MPa | T /K          | P /MPa | T /K          | P /Mpa |
| <b>332.15</b>   | 27.5   | <b>363.15</b> | 8.3    | <b>384.15</b> | 144.5  |
| <b>334.15</b>   | 31.5   | <b>367.15</b> | 32.1   | <b>388.15</b> | 174.8  |
| <b>338.15</b>   | 41.0   | <b>368.15</b> | 37.7   | <b>391.15</b> | 185.3  |
| <b>341.65</b>   | 50.5   | <b>369.15</b> | 46.7   | <b>396.15</b> | 212.4  |
| <b>344.15</b>   | 51.5   | <b>370.15</b> | 55.3   | <b>398.15</b> | 227.8  |
| <b>351.15</b>   | 63.1   | <b>373.15</b> | 67.4   | <b>400.15</b> | 244.8  |
| <b>358.15</b>   | 83.6   | <b>374.15</b> | 86.4   |               |        |
| <b>368.15</b>   | 95.6   | <b>378.15</b> | 109.9  |               |        |
| <b>376.15</b>   | 110.9  | <b>378.15</b> | 97.7   |               |        |

**Table S6. Entropy (S), Enthalpy (H), and Gibbs free energy (G) of the stable form I and form II as obtained from the heat capacity measurements (Table S1). Transition peaks are marked with a yellow background.**

| Form I – form II (stable) |                                              |                               |                                        |
|---------------------------|----------------------------------------------|-------------------------------|----------------------------------------|
| Temperature /K            | Entropy /J K <sup>-1</sup> mol <sup>-1</sup> | Enthalpy /J mol <sup>-1</sup> | Gibbs free energy /J mol <sup>-1</sup> |
| <b>0</b>                  | 0 <sup>a</sup>                               | 0 <sup>a</sup>                | 0 <sup>a</sup>                         |
| <b>1.000</b>              | 0.274421 <sup>a</sup>                        | 0.137211 <sup>a</sup>         | -0.13721 <sup>a</sup>                  |
| <b>2.000</b>              | 0.551137 <sup>a</sup>                        | 0.552285 <sup>a</sup>         | -0.549989 <sup>a</sup>                 |
| <b>3.000</b>              | 0.832442 <sup>a</sup>                        | 1.25555 <sup>a</sup>          | -1.241776 <sup>a</sup>                 |
| <b>4.000</b>              | 1.12063 <sup>a</sup>                         | 2.26421 <sup>a</sup>          | -2.21831 <sup>a</sup>                  |
| <b>5.000</b>              | 1.418 <sup>a</sup>                           | 3.60236 <sup>a</sup>          | -3.48764 <sup>a</sup>                  |



|               |                      |                      |                        |
|---------------|----------------------|----------------------|------------------------|
| <b>6.000</b>  | 1.72684 <sup>a</sup> | 5.30098 <sup>a</sup> | -5.06006 <sup>a</sup>  |
| <b>7.000</b>  | 2.04945 <sup>a</sup> | 7.39793 <sup>a</sup> | -6.94822 <sup>a</sup>  |
| <b>8.000</b>  | 2.38812 <sup>a</sup> | 9.93797 <sup>a</sup> | -9.16699 <sup>a</sup>  |
| <b>9.000</b>  | 2.74515 <sup>a</sup> | 12.9727 <sup>a</sup> | -11.73365 <sup>a</sup> |
| <b>10.000</b> | 3.12283 <sup>a</sup> | 16.5607 <sup>a</sup> | -14.6676 <sup>a</sup>  |
| <b>11.000</b> | 3.52345 <sup>a</sup> | 20.7673 <sup>a</sup> | -17.99065 <sup>a</sup> |
| <b>12.000</b> | 3.94932 <sup>a</sup> | 25.6647 <sup>a</sup> | -21.72714 <sup>a</sup> |
| <b>12.588</b> | 4.21037              | 28.874               | -24.125717             |
| <b>13.940</b> | 4.84353              | 37.2722              | -30.245155             |
| <b>15.153</b> | 5.46522              | 46.3154              | -36.496893             |
| <b>16.256</b> | 6.0863               | 56.0691              | -42.87101              |
| <b>17.335</b> | 6.74286              | 67.0963              | -49.791852             |
| <b>18.454</b> | 7.46772              | 80.0674              | -57.741158             |
| <b>19.281</b> | 8.02866              | 90.6509              | -64.152102             |
| <b>20.274</b> | 8.72892              | 104.501              | -72.47087              |
| <b>21.239</b> | 9.43614              | 119.18               | -81.234177             |
| <b>22.180</b> | 10.1489              | 134.654              | -90.446572             |
| <b>23.100</b> | 10.8688              | 150.952              | -100.11945             |
| <b>24.345</b> | 11.8846              | 175.049              | -114.28396             |
| <b>25.827</b> | 13.1459              | 206.691              | -132.82816             |
| <b>27.341</b> | 14.4708              | 241.912              | -153.73704             |
| <b>28.877</b> | 15.854               | 280.793              | -177.01503             |
| <b>30.536</b> | 17.3953              | 326.579              | -204.6004              |
| <b>32.202</b> | 18.9686              | 375.93               | -234.90255             |
| <b>33.776</b> | 20.478               | 425.724              | -265.93888             |
| <b>35.371</b> | 22.0351              | 479.56               | -299.83912             |
| <b>36.991</b> | 23.6352              | 537.453              | -336.83668             |
| <b>38.636</b> | 25.2777              | 599.562              | -377.05963             |
| <b>40.308</b> | 26.9661              | 666.206              | -420.74895             |
| <b>41.906</b> | 28.5914              | 733.014              | -465.12863             |
| <b>43.462</b> | 30.1829              | 800.949              | -510.84813             |
| <b>45.005</b> | 31.766               | 870.971              | -558.64195             |
| <b>46.524</b> | 33.3282              | 942.467              | -608.09418             |
| <b>48.026</b> | 34.8747              | 1015.57              | -659.30839             |
| <b>49.514</b> | 36.4103              | 1090.47              | -712.35688             |
| <b>50.986</b> | 37.9313              | 1166.9               | -767.06147             |
| <b>52.437</b> | 39.4319              | 1244.5               | -823.18265             |
| <b>53.870</b> | 40.9137              | 1323.26              | -880.7692              |
| <b>55.289</b> | 42.3778              | 1403.17              | -939.84347             |
| <b>56.695</b> | 43.823               | 1484.09              | -1000.4594             |
| <b>58.090</b> | 45.2592              | 1566.51              | -1062.5924             |
| <b>59.476</b> | 46.6848              | 1650.31              | -1126.3058             |

|                |         |         |            |
|----------------|---------|---------|------------|
| <b>60.857</b>  | 48.0971 | 1735.29 | -1191.76   |
| <b>62.233</b>  | 49.5027 | 1821.8  | -1258.8867 |
| <b>63.604</b>  | 50.9014 | 1909.8  | -1327.7276 |
| <b>64.972</b>  | 52.2936 | 1999.3  | -1398.2936 |
| <b>66.337</b>  | 53.6814 | 2090.42 | -1470.6484 |
| <b>67.701</b>  | 55.0644 | 2183.1  | -1544.8315 |
| <b>69.065</b>  | 56.4421 | 2277.31 | -1620.858  |
| <b>70.680</b>  | 58.067  | 2390.85 | -1713.2965 |
| <b>72.028</b>  | 59.4183 | 2487.27 | -1792.4935 |
| <b>73.378</b>  | 60.7647 | 2585.16 | -1873.6565 |
| <b>74.731</b>  | 62.1122 | 2684.95 | -1956.763  |
| <b>76.087</b>  | 63.4608 | 2786.64 | -2041.9146 |
| <b>77.448</b>  | 64.8048 | 2889.82 | -2129.1692 |
| <b>78.813</b>  | 66.1412 | 2994.23 | -2218.5233 |
| <b>80.181</b>  | 67.4743 | 3100.21 | -2309.9334 |
| <b>81.554</b>  | 68.8141 | 3208.56 | -2403.5189 |
| <b>82.933</b>  | 70.1531 | 3318.68 | -2499.292  |
| <b>84.316</b>  | 71.4924 | 3430.68 | -2597.2803 |
| <b>85.705</b>  | 72.8373 | 3545.01 | -2697.5254 |
| <b>87.100</b>  | 74.1842 | 3661.38 | -2800.0861 |
| <b>88.504</b>  | 75.5307 | 3779.61 | -2905.144  |
| <b>90.077</b>  | 77.035  | 3913.93 | -3025.1594 |
| <b>91.654</b>  | 78.5387 | 4050.57 | -3147.816  |
| <b>93.234</b>  | 80.0385 | 4189.21 | -3273.1315 |
| <b>94.819</b>  | 81.5355 | 4329.97 | -3401.1283 |
| <b>96.408</b>  | 83.0316 | 4473.02 | -3531.849  |
| <b>98.001</b>  | 84.5276 | 4618.43 | -3665.3762 |
| <b>99.600</b>  | 86.023  | 4766.19 | -3801.7094 |
| <b>101.205</b> | 87.5198 | 4916.46 | -3940.9814 |
| <b>102.815</b> | 89.017  | 5069.19 | -4083.0929 |
| <b>104.432</b> | 90.5141 | 5224.33 | -4228.2385 |
| <b>106.055</b> | 92.0116 | 5381.93 | -4376.3602 |
| <b>107.686</b> | 93.5094 | 5542    | -4527.6532 |
| <b>109.323</b> | 95.0084 | 5704.65 | -4681.9533 |
| <b>110.968</b> | 96.5105 | 5870.1  | -4839.4772 |
| <b>112.621</b> | 98.014  | 6038.18 | -5000.2547 |
| <b>114.281</b> | 99.519  | 6208.93 | -5164.2008 |
| <b>115.951</b> | 101.025 | 6382.24 | -5331.7098 |
| <b>117.628</b> | 102.531 | 6558.15 | -5502.3665 |
| <b>119.314</b> | 104.042 | 6737.15 | -5676.5172 |
| <b>121.008</b> | 105.554 | 6918.86 | -5854.0184 |
| <b>122.712</b> | 107.068 | 7103.32 | -6035.2084 |

|                |         |         |            |
|----------------|---------|---------|------------|
| <b>124.425</b> | 108.585 | 7290.78 | -6219.9086 |
| <b>126.147</b> | 110.105 | 7481.23 | -6408.1854 |
| <b>127.879</b> | 111.628 | 7674.74 | -6600.137  |
| <b>129.620</b> | 113.154 | 7871.22 | -6795.8015 |
| <b>131.371</b> | 114.681 | 8070.43 | -6995.3277 |
| <b>133.132</b> | 116.212 | 8272.86 | -7198.676  |
| <b>134.902</b> | 117.749 | 8478.91 | -7405.6656 |
| <b>136.683</b> | 119.292 | 8688.4  | -7616.7884 |
| <b>138.474</b> | 120.834 | 8900.59 | -7831.7773 |
| <b>140.275</b> | 122.379 | 9115.9  | -8050.8142 |
| <b>142.087</b> | 123.931 | 9335.05 | -8273.934  |
| <b>143.909</b> | 125.489 | 9557.83 | -8501.1665 |
| <b>145.741</b> | 127.054 | 9784.45 | -8732.527  |
| <b>147.586</b> | 128.624 | 10014.7 | -8968.4017 |
| <b>149.439</b> | 130.199 | 10248.6 | -9208.2084 |
| <b>151.304</b> | 131.777 | 10485.9 | -9452.4872 |
| <b>153.180</b> | 133.355 | 10726.2 | -9701.1189 |
| <b>155.066</b> | 134.941 | 10970.6 | -9954.1611 |
| <b>156.965</b> | 136.534 | 11219.1 | -10211.959 |
| <b>158.874</b> | 138.129 | 11471   | -10474.107 |
| <b>160.794</b> | 139.728 | 11726.6 | -10740.824 |
| <b>162.726</b> | 141.331 | 11985.9 | -11012.328 |
| <b>164.669</b> | 142.939 | 12249.1 | -11288.522 |
| <b>166.624</b> | 144.555 | 12516.8 | -11569.532 |
| <b>168.590</b> | 146.178 | 12788.8 | -11855.349 |
| <b>170.567</b> | 147.804 | 13064.6 | -12145.885 |
| <b>172.555</b> | 149.439 | 13345   | -12441.447 |
| <b>174.557</b> | 151.082 | 13630.2 | -12742.221 |
| <b>176.577</b> | 152.735 | 13920.5 | -13048.988 |
| <b>178.624</b> | 154.403 | 14216.6 | -13363.481 |
| <b>180.690</b> | 156.083 | 14518.5 | -13684.137 |
| <b>182.777</b> | 157.775 | 14826   | -14011.641 |
| <b>184.883</b> | 159.477 | 15138.9 | -14345.686 |
| <b>187.008</b> | 161.195 | 15458.3 | -14686.455 |
| <b>189.153</b> | 162.924 | 15783.5 | -15034.063 |
| <b>191.317</b> | 164.664 | 16114.4 | -15388.622 |
| <b>193.503</b> | 166.417 | 16451.8 | -15750.389 |
| <b>195.705</b> | 168.181 | 16795.1 | -16118.763 |
| <b>197.928</b> | 169.958 | 17144.8 | -16494.647 |
| <b>200.169</b> | 171.749 | 17501.2 | -16877.626 |
| <b>202.432</b> | 173.552 | 17864.2 | -17268.278 |
| <b>204.712</b> | 175.366 | 18233.5 | -17666.025 |

|                |         |         |            |
|----------------|---------|---------|------------|
| <b>207.011</b> | 177.196 | 18610.2 | -18071.321 |
| <b>209.330</b> | 179.034 | 18992.9 | -18484.287 |
| <b>211.669</b> | 180.888 | 19383.1 | -18905.282 |
| <b>214.025</b> | 182.758 | 19781.2 | -19333.581 |
| <b>216.401</b> | 184.642 | 20186.7 | -19770.013 |
| <b>218.797</b> | 186.541 | 20600   | -20214.611 |
| <b>221.210</b> | 188.448 | 21019.5 | -20667.082 |
| <b>223.642</b> | 190.367 | 21446.2 | -21127.857 |
| <b>226.094</b> | 192.292 | 21879   | -21597.067 |
| <b>228.564</b> | 194.232 | 22320.2 | -22074.243 |
| <b>231.052</b> | 196.195 | 22771.1 | -22560.147 |
| <b>233.558</b> | 198.172 | 23230.6 | -23054.056 |
| <b>236.085</b> | 200.159 | 23697   | -23557.538 |
| <b>238.629</b> | 202.15  | 24169.8 | -24069.052 |
| <b>241.190</b> | 204.16  | 24651.9 | -24589.45  |
| <b>243.770</b> | 206.189 | 25144   | -25118.693 |
| <b>246.372</b> | 208.235 | 25645.4 | -25657.873 |
| <b>248.988</b> | 210.287 | 26153.4 | -26205.54  |
| <b>251.623</b> | 212.35  | 26669.9 | -26762.244 |
| <b>254.277</b> | 214.416 | 27192.6 | -27328.457 |
| <b>256.950</b> | 216.5   | 27725.1 | -27904.575 |
| <b>259.638</b> | 218.605 | 28269   | -28489.165 |
| <b>262.345</b> | 220.722 | 28821.4 | -29083.913 |
| <b>265.070</b> | 222.85  | 29382.7 | -29688.15  |
| <b>267.814</b> | 224.984 | 29951.1 | -30302.765 |
| <b>270.576</b> | 227.135 | 30530.2 | -30927.08  |
| <b>273.352</b> | 229.318 | 31123.9 | -31560.634 |
| <b>276.147</b> | 231.514 | 31727.3 | -32204.597 |
| <b>278.960</b> | 233.718 | 32339   | -32858.973 |
| <b>281.791</b> | 235.936 | 32961   | -33523.641 |
| <b>284.638</b> | 238.178 | 33595.9 | -34198.61  |
| <b>287.508</b> | 240.435 | 34241.4 | -34885.586 |
| <b>290.391</b> | 242.695 | 34894.5 | -35581.944 |
| <b>292.949</b> | 244.719 | 35485   | -36205.186 |
| <b>295.898</b> | 247.05  | 36171.3 | -36930.301 |
| <b>298.899</b> | 249.426 | 36877.9 | -37675.282 |
| <b>301.930</b> | 251.795 | 37589.7 | -38434.764 |
| <b>304.983</b> | 254.224 | 38326.9 | -39207.098 |
| <b>308.057</b> | 256.674 | 39077.7 | -39992.522 |
| <b>311.149</b> | 259.2   | 39859.9 | -40789.921 |
| <b>314.256</b> | 261.832 | 40682.7 | -41599.577 |
| <b>317.376</b> | 264.563 | 41545.3 | -42420.647 |

|                |         |         |            |
|----------------|---------|---------|------------|
| <b>320.454</b> | 267.783 | 42572.4 | -43239.733 |
| <b>323.542</b> | 270.991 | 43605.3 | -44071.67  |
| <b>326.712</b> | 273.685 | 44481.1 | -44935.074 |
| <b>329.905</b> | 276.279 | 45332.7 | -45813.123 |
| <b>333.100</b> | 278.893 | 46199.1 | -46700.158 |
| <b>336.303</b> | 281.516 | 47077.2 | -47597.475 |
| <b>339.514</b> | 284.159 | 47970.3 | -48505.659 |
| <b>342.732</b> | 286.827 | 48880.4 | -49424.391 |
| <b>345.953</b> | 289.542 | 49815.2 | -50352.724 |

<sup>a</sup> Data obtained by extrapolation, stable form *H* and *G* set to 0.

**Table S7. Entropy (S), Enthalpy (H), and Gibbs free energy (G) of the metastable form III and form II as obtained from the heat capacity measurements (Table S1). Transition peaks are marked with a yellow background.**

| <b>Form III (metastable) – form II (metastable, stable) – melt (stable)</b> |                                                       |                                         |                                                  |
|-----------------------------------------------------------------------------|-------------------------------------------------------|-----------------------------------------|--------------------------------------------------|
| <b>Temperature<br/>/K</b>                                                   | <b>Entropy<br/>/J K<sup>-1</sup> mol<sup>-1</sup></b> | <b>Enthalpy<br/>/J mol<sup>-1</sup></b> | <b>Gibbs free energy<br/>/J mol<sup>-1</sup></b> |
| <b>0</b>                                                                    | 0.015 <sup>a</sup>                                    | 197.4 <sup>a</sup>                      | 197.4 <sup>a</sup>                               |
| <b>1</b>                                                                    | 0.300052 <sup>a</sup>                                 | 197.542526 <sup>a</sup>                 | 197.242474 <sup>a</sup>                          |
| <b>2</b>                                                                    | 0.587537 <sup>a</sup>                                 | 197.973754 <sup>a</sup>                 | 196.79868 <sup>a</sup>                           |
| <b>3</b>                                                                    | 0.879889 <sup>a</sup>                                 | 198.70463 <sup>a</sup>                  | 196.064963 <sup>a</sup>                          |
| <b>4</b>                                                                    | 1.17954 <sup>a</sup>                                  | 199.75341 <sup>a</sup>                  | 195.03525 <sup>a</sup>                           |
| <b>5</b>                                                                    | 1.48892 <sup>a</sup>                                  | 201.14564 <sup>a</sup>                  | 193.70104 <sup>a</sup>                           |
| <b>6</b>                                                                    | 1.81047 <sup>a</sup>                                  | 202.91416 <sup>a</sup>                  | 192.05134 <sup>a</sup>                           |
| <b>7</b>                                                                    | 2.14662 <sup>a</sup>                                  | 205.09912 <sup>a</sup>                  | 190.07278 <sup>a</sup>                           |
| <b>8</b>                                                                    | 2.4998 <sup>a</sup>                                   | 207.748 <sup>a</sup>                    | 187.7496 <sup>a</sup>                            |
| <b>9</b>                                                                    | 2.87244 <sup>a</sup>                                  | 210.9155 <sup>a</sup>                   | 185.06354 <sup>a</sup>                           |
| <b>10</b>                                                                   | 3.26699 <sup>a</sup>                                  | 214.6636 <sup>a</sup>                   | 181.9937 <sup>a</sup>                            |
| <b>11</b>                                                                   | 3.68586 <sup>a</sup>                                  | 219.0618 <sup>a</sup>                   | 178.51734 <sup>a</sup>                           |
| <b>11.3819</b>                                                              | 3.84777                                               | 220.8737                                | 177.078767                                       |
| <b>13.5115</b>                                                              | 4.83979                                               | 233.2211                                | 167.828277                                       |
| <b>15.2101</b>                                                              | 5.7622                                                | 246.4677                                | 158.824062                                       |
| <b>16.6707</b>                                                              | 6.64781                                               | 260.5847                                | 149.761054                                       |
| <b>17.9748</b>                                                              | 7.50827                                               | 275.49                                  | 140.530348                                       |
| <b>19.1681</b>                                                              | 8.34465                                               | 291.023                                 | 131.071914                                       |
| <b>20.2787</b>                                                              | 9.16526                                               | 307.208                                 | 121.348442                                       |
| <b>21.3266</b>                                                              | 9.9744                                                | 324.04                                  | 111.319961                                       |
| <b>22.3356</b>                                                              | 10.7775                                               | 341.574                                 | 100.852071                                       |
| <b>23.3134</b>                                                              | 11.5777                                               | 359.837                                 | 89.9214488                                       |
| <b>24.2656</b>                                                              | 12.3795                                               | 378.912                                 | 78.5160048                                       |
| <b>25.2296</b>                                                              | 13.2116                                               | 399.503                                 | 66.1796166                                       |
| <b>26.2313</b>                                                              | 14.0916                                               | 422.147                                 | 52.5060129                                       |
| <b>27.2547</b>                                                              | 15.0029                                               | 446.518                                 | 37.6184614                                       |

|                |         |          |            |
|----------------|---------|----------|------------|
| <b>28.2766</b> | 15.9242 | 472.097  | 21.8147663 |
| <b>29.2449</b> | 16.8173 | 497.783  | 5.96274323 |
| <b>31.2241</b> | 18.6743 | 553.929  | -29.159211 |
| <b>32.2395</b> | 19.6346 | 584.402  | -48.607687 |
| <b>33.3552</b> | 20.7053 | 619.517  | -71.112423 |
| <b>34.5241</b> | 21.8437 | 658.156  | -95.978083 |
| <b>35.6734</b> | 22.9759 | 697.895  | -121.73347 |
| <b>36.8756</b> | 24.1696 | 741.196  | -150.0725  |
| <b>38.1945</b> | 25.489  | 790.719  | -182.82061 |
| <b>39.6201</b> | 26.9265 | 846.646  | -220.18462 |
| <b>41.1425</b> | 28.4733 | 909.11   | -262.35275 |
| <b>42.6936</b> | 30.0593 | 975.592  | -307.74773 |
| <b>44.2122</b> | 31.6175 | 1043.299 | -354.58023 |
| <b>45.7058</b> | 33.1524 | 1112.308 | -402.94896 |
| <b>47.1808</b> | 34.6705 | 1182.812 | -452.96993 |
| <b>48.6805</b> | 36.2167 | 1256.92  | -506.12706 |
| <b>50.199</b>  | 37.7853 | 1334.47  | -562.31427 |
| <b>51.6915</b> | 39.3237 | 1412.85  | -619.85104 |
| <b>53.1583</b> | 40.8386 | 1492.27  | -678.64055 |
| <b>54.6095</b> | 42.3383 | 1573.08  | -738.99339 |
| <b>56.046</b>  | 43.8159 | 1654.83  | -800.87593 |
| <b>57.4689</b> | 45.2779 | 1737.81  | -864.26111 |
| <b>58.8807</b> | 46.7257 | 1822.03  | -929.21192 |
| <b>60.2831</b> | 48.1606 | 1907.53  | -995.74027 |
| <b>61.6783</b> | 49.5851 | 1994.4   | -1063.9247 |
| <b>63.0678</b> | 50.9982 | 2082.53  | -1133.8143 |
| <b>64.4509</b> | 52.4062 | 2172.31  | -1205.3168 |
| <b>65.8318</b> | 53.8103 | 2263.78  | -1278.6489 |
| <b>67.2113</b> | 55.197  | 2356.02  | -1353.8421 |
| <b>68.529</b>  | 56.5192 | 2445.76  | -1427.4443 |
| <b>69.907</b>  | 57.9079 | 2541.88  | -1506.2876 |
| <b>71.2838</b> | 59.289  | 2639.38  | -1586.9652 |
| <b>72.6627</b> | 60.6651 | 2738.42  | -1669.67   |
| <b>74.0427</b> | 62.0375 | 2839.09  | -1754.334  |
| <b>75.4244</b> | 63.4057 | 2941.34  | -1840.9969 |
| <b>76.8084</b> | 64.7713 | 3045.28  | -1929.6999 |
| <b>78.1951</b> | 66.1355 | 3151.01  | -2020.462  |
| <b>79.5853</b> | 67.4975 | 3258.46  | -2113.3488 |
| <b>80.9784</b> | 68.856  | 3367.52  | -2208.3287 |
| <b>82.3766</b> | 70.2151 | 3478.53  | -2305.5512 |
| <b>83.7793</b> | 71.5737 | 3591.4   | -2404.9945 |
| <b>85.1866</b> | 72.9321 | 3706.17  | -2506.6676 |

|                |         |          |            |
|----------------|---------|----------|------------|
| <b>86.5992</b> | 74.2902 | 3822.82  | -2610.6519 |
| <b>87.5999</b> | 75.2489 | 3906.32  | -2685.4761 |
| <b>89.1608</b> | 76.7405 | 4038.15  | -2804.0944 |
| <b>90.7247</b> | 78.2286 | 4171.99  | -2925.2763 |
| <b>92.2917</b> | 79.7152 | 4308.03  | -3049.0213 |
| <b>93.8631</b> | 81.2017 | 4446.39  | -3175.4533 |
| <b>95.4392</b> | 82.6859 | 4586.86  | -3304.6161 |
| <b>97.02</b>   | 84.1689 | 4729.57  | -3436.4967 |
| <b>98.6061</b> | 85.6516 | 4874.6   | -3571.1702 |
| <b>100.198</b> | 87.133  | 5021.86  | -3708.6923 |
| <b>101.796</b> | 88.6145 | 5171.48  | -3849.1216 |
| <b>103.399</b> | 90.0973 | 5323.62  | -3992.3507 |
| <b>105.01</b>  | 91.5813 | 5478.26  | -4138.6923 |
| <b>106.628</b> | 93.0675 | 5635.52  | -4288.0814 |
| <b>108.252</b> | 94.5555 | 5795.39  | -4440.432  |
| <b>109.885</b> | 96.0462 | 5957.98  | -4596.0567 |
| <b>111.525</b> | 97.5386 | 6123.2   | -4754.7924 |
| <b>113.172</b> | 99.0311 | 6290.88  | -4916.6676 |
| <b>114.829</b> | 100.526 | 6461.27  | -5082.0301 |
| <b>116.493</b> | 102.022 | 6634.33  | -5250.5188 |
| <b>118.166</b> | 103.52  | 6810.05  | -5422.4943 |
| <b>119.848</b> | 105.021 | 6988.74  | -5597.8168 |
| <b>121.539</b> | 106.525 | 7170.28  | -5776.662  |
| <b>123.238</b> | 108.031 | 7354.55  | -5958.9744 |
| <b>124.947</b> | 109.54  | 7541.81  | -6144.8844 |
| <b>126.666</b> | 111.052 | 7732.04  | -6334.4726 |
| <b>128.394</b> | 112.568 | 7925.36  | -6527.6958 |
| <b>130.132</b> | 114.087 | 8121.69  | -6724.6795 |
| <b>131.88</b>  | 115.611 | 8321.42  | -6925.3587 |
| <b>133.637</b> | 117.14  | 8524.36  | -7129.8782 |
| <b>135.405</b> | 118.671 | 8730.32  | -7338.3268 |
| <b>137.182</b> | 120.206 | 8939.52  | -7550.5795 |
| <b>138.971</b> | 121.744 | 9151.81  | -7767.0754 |
| <b>140.77</b>  | 123.285 | 9367.41  | -7987.4195 |
| <b>142.579</b> | 124.832 | 9586.57  | -8211.8517 |
| <b>144.398</b> | 126.384 | 9809.24  | -8440.3568 |
| <b>146.229</b> | 127.941 | 10035.56 | -8673.1245 |
| <b>148.07</b>  | 129.506 | 10265.8  | -8910.1534 |
| <b>149.922</b> | 131.074 | 10499.4  | -9151.4762 |
| <b>151.785</b> | 132.644 | 10736.3  | -9397.0695 |
| <b>153.659</b> | 134.219 | 10976.9  | -9647.0573 |
| <b>155.544</b> | 135.796 | 11220.7  | -9901.553  |

|                |         |         |            |
|----------------|---------|---------|------------|
| <b>157.44</b>  | 137.377 | 11468.1 | -10160.535 |
| <b>159.28</b>  | 138.91  | 11710.8 | -10414.785 |
| <b>161.199</b> | 140.506 | 11966.5 | -10682.927 |
| <b>163.129</b> | 142.103 | 12225.5 | -10955.62  |
| <b>165.07</b>  | 143.706 | 12488.5 | -11233.049 |
| <b>167.024</b> | 145.31  | 12754.9 | -11515.357 |
| <b>168.982</b> | 146.912 | 13024.1 | -11801.384 |
| <b>170.947</b> | 148.523 | 13297.8 | -12091.761 |
| <b>172.933</b> | 150.147 | 13577.2 | -12388.171 |
| <b>174.939</b> | 151.783 | 13861.7 | -12691.066 |
| <b>176.965</b> | 153.43  | 14151.4 | -13000.34  |
| <b>179.011</b> | 155.089 | 14446.7 | -13315.937 |
| <b>181.077</b> | 156.76  | 14747.6 | -13638.031 |
| <b>183.162</b> | 158.441 | 15053.8 | -13966.57  |
| <b>185.267</b> | 160.138 | 15366.3 | -14301.987 |
| <b>187.392</b> | 161.843 | 15684   | -14644.083 |
| <b>189.537</b> | 163.557 | 16007.1 | -14993.003 |
| <b>191.7</b>   | 165.287 | 16336.8 | -15348.718 |
| <b>193.883</b> | 167.03  | 16672.8 | -15711.477 |
| <b>196.086</b> | 168.785 | 17015.1 | -16081.276 |
| <b>198.308</b> | 170.552 | 17363.5 | -16458.326 |
| <b>200.549</b> | 172.332 | 17718.6 | -16842.41  |
| <b>202.81</b>  | 174.127 | 18080.5 | -17234.197 |
| <b>205.09</b>  | 175.928 | 18447.9 | -17633.174 |
| <b>207.391</b> | 177.743 | 18822.1 | -18040.199 |
| <b>209.708</b> | 179.573 | 19203.8 | -18454.095 |
| <b>212.046</b> | 181.415 | 19592.2 | -18876.125 |
| <b>214.402</b> | 183.27  | 19987.8 | -19305.655 |
| <b>216.777</b> | 185.139 | 20390.7 | -19743.177 |
| <b>219.172</b> | 187.019 | 20800.4 | -20188.928 |
| <b>221.587</b> | 188.915 | 21218.3 | -20642.808 |
| <b>224.019</b> | 190.825 | 21643.8 | -21104.626 |
| <b>226.469</b> | 192.743 | 22075.9 | -21574.414 |
| <b>228.939</b> | 194.675 | 22515.8 | -22052.9   |
| <b>231.426</b> | 196.625 | 22964.6 | -22539.537 |
| <b>233.936</b> | 198.592 | 23422.3 | -23035.518 |
| <b>236.461</b> | 200.565 | 23886.5 | -23539.3   |
| <b>239.005</b> | 202.55  | 24358.3 | -24052.163 |
| <b>241.567</b> | 204.548 | 24838.4 | -24573.647 |
| <b>244.148</b> | 206.559 | 25326.9 | -25104.067 |
| <b>246.746</b> | 208.591 | 25825.5 | -25643.495 |
| <b>249.367</b> | 210.636 | 26332.9 | -26192.767 |



|                |                |                |                   |
|----------------|----------------|----------------|-------------------|
| <b>250.682</b> | 211.652        | 26587.6        | -26469.747        |
| <b>252.659</b> | 213.192        | 26974.9        | -26889.978        |
| <b>254.645</b> | 214.736        | 27366.6        | -27314.849        |
| <b>256.64</b>  | 216.288        | 27763.4        | -27744.752        |
| <b>258.643</b> | 217.848        | 28165.3        | -28179.56         |
| <b>260.655</b> | 219.418        | 28572.9        | -28619.499        |
| <b>262.673</b> | 221.011        | 28989.8        | -29063.822        |
| <b>264.691</b> | <b>222.681</b> | <b>29430.3</b> | <b>-29511.357</b> |
| <b>266.702</b> | <b>224.485</b> | <b>29909.4</b> | <b>-29961.198</b> |
| <b>268.629</b> | <b>227.029</b> | <b>30590.6</b> | <b>-30395.973</b> |
| <b>270.643</b> | 228.908        | 31097          | -30855.348        |
| <b>272.705</b> | 230.526        | 31536.6        | -31328.993        |
| <b>274.775</b> | 232.158        | 31983.3        | -31807.914        |
| <b>276.856</b> | 233.781        | 32431          | -32292.673        |
| <b>278.731</b> | 235.267        | 32844          | -32732.206        |
| <b>280.841</b> | 236.934        | 33310.3        | -33230.481        |
| <b>282.967</b> | 238.607        | 33782          | -33735.907        |
| <b>285.113</b> | 240.302        | 34263.5        | -34249.724        |
| <b>287.278</b> | 242.016        | 34753.8        | -34772.072        |
| <b>289.4</b>   | 243.698        | 35238.8        | -35287.401        |
| <b>292.211</b> | 245.929        | 35887.8        | -35975.359        |
| <b>295.047</b> | 248.187        | 36550.7        | -36676.13         |
| <b>297.909</b> | 250.469        | 37227.2        | -37389.769        |
| <b>300.796</b> | 252.767        | 37915.1        | -38116.203        |
| <b>303.708</b> | 255.088        | 38616.7        | -38855.566        |
| <b>306.645</b> | 257.44         | 39334.3        | -39608.389        |
| <b>309.605</b> | 259.818        | 40067.4        | -40373.552        |
| <b>312.59</b>  | 262.225        | 40815.9        | -41153.013        |
| <b>315.599</b> | 264.659        | 41580.4        | -41945.716        |
| <b>318.633</b> | 267.118        | 42360.3        | -42752.31         |
| <b>321.691</b> | 269.6          | 43155.1        | -43572.794        |
| <b>324.772</b> | 272.106        | 43964.9        | -44407.51         |
| <b>327.878</b> | 274.635        | 44790.2        | -45256.575        |
| <b>331.4</b>   | 277.507        | 45737          | -46228.82         |
| <b>332.804</b> | 278.654        | 46119.1        | -46618.066        |
| <b>335.622</b> | 280.961        | 46889.9        | -47406.793        |
| <b>338.45</b>  | 283.282        | 47672.2        | -48204.593        |
| <b>341.287</b> | 285.621        | 48467.1        | -49011.634        |
| <b>344.129</b> | 287.99         | 49279.1        | -49826.611        |
| <b>346.974</b> | 290.411        | 50115.7        | -50649.366        |
| <b>349.817</b> | 292.923        | 50990.9        | -51478.545        |
| <b>352.642</b> | <b>295.618</b> | <b>51937.3</b> | <b>-52310.023</b> |

|                |         |         |            |
|----------------|---------|---------|------------|
| <b>355.411</b> | 298.733 | 53040   | -53132.994 |
| <b>358.018</b> | 302.949 | 54544.1 | -53917.095 |
| <b>360.15</b>  | 310.245 | 57164.1 | -54570.637 |
| <b>361.356</b> | 323.476 | 61937   | -54952.993 |
| <b>361.866</b> | 341.18  | 68339.2 | -55122.242 |
| <b>362.189</b> | 360.274 | 75251.7 | -55235.58  |
| <b>364.594</b> | 366.179 | 77397.3 | -56109.366 |
| <b>367.52</b>  | 368.87  | 78382.5 | -57184.602 |
| <b>370.458</b> | 371.552 | 79372.3 | -58272.111 |

<sup>a</sup> Data obtained by extrapolation, metastable form H and G relative to stable form in Table XS2.  $S \neq 0$  at 0 K may be due to experimental error or the extrapolation of  $C_p$  to 0K.

## CLAUSIUS-CLAPEYRON EQUATION AND THE VAPOUR PRESSURES OF THE CONDENSED PHASES

The Clausius-Clapeyron equation can be written as:

$$\ln P = -\frac{\Delta H}{RT} + B \quad (S3)$$

In this equation  $P$  is the vapour pressure of the condensed phase,  $\Delta H$  is the enthalpy of vaporization in case of the liquid and the sublimation enthalpy in case of a solid,  $R$  is the gas constant,  $8.314472 \text{ J K}^{-1} \text{ mol}^{-1}$ ,  $T$  is the temperature in kelvin and  $B$  is a constant.

Using the boiling point and the enthalpy of vaporization of 583.85 K and  $55160 \text{ kJ mol}^{-1}$  obtained from ACD/Labs (ACDLabs *Advanced Chemistry Development (ACD/Labs) Software*, V11.02), the constant  $B_{\text{vap}}$  can be calculated. It should be realised that at the boiling point the vapour pressure of the liquid is equal to the pressure in the atmosphere or  $1 \times 10^5 \text{ Pa}$ . Since  $\Delta H$ ,  $R$ , and  $T$  are known in eq. S3,  $B$  can be obtained. The results can be found in Table S8. With these parameters the vapour pressure of the liquid can be calculated at the melting point of form II and because the liquid and form II are at equilibrium at the melting point, their vapour pressures must be the same (triple point II-I-v). Moreover, the enthalpy of vaporization is known, thus through thermodynamic cycling, the enthalpy of sublimation of form II should be the enthalpy of vaporization with the melting enthalpy added to it:  $\Delta_{\text{II} \rightarrow \text{v}}H = \Delta_{\text{I} \rightarrow \text{v}}H + \Delta_{\text{II} \rightarrow \text{I}}H = 55160 + 22038 = 77198 \text{ J mol}^{-1}$ . With this information  $B_{\text{II}}$  can be calculated. The same can be done for form I, using as enthalpy of sublimation  $\Delta_{\text{I} \rightarrow \text{v}}H = \Delta_{\text{I} \rightarrow \text{v}}H + \Delta_{\text{II} \rightarrow \text{I}}H + \Delta_{\text{I} \rightarrow \text{II}}H = 77828 \text{ J mol}^{-1}$ . The pressure at the fusion of form I can be calculated with the equation for the liquid leading to 83 Pa and with this information the constant  $B_{\text{I}}$  can be determined. In the same way the vapour pressure of form III can be obtained.

**Table S8. Vapour pressure calculations <sup>a</sup>**

| Phase      | Transition | Temperature /K | Pressure /Pa      | $\Delta H$ /J mol <sup>-1</sup> | B     |
|------------|------------|----------------|-------------------|---------------------------------|-------|
| Liquid (I) | boiling    | 583.85         | 1×10 <sup>5</sup> | 55160                           | 22.88 |
| II         | fusion II  | 362.0          | 95                | 77198                           | 30.20 |
| I          | fusion I   | 359.5          | 83                | 77828                           | 30.46 |
| III        | fusion III | 358.3          | 78                | 77648                           | 30.42 |

<sup>a</sup> italic values have been calculated using eq. S3 and  $R = 8.314472 \text{ J K}^{-1} \text{ mol}^{-1}$

Once the vapour pressure data of each condensed phase is given by the Clausius-Clapeyron equation (eq. S3), it can be demonstrated which phase is the most stable by comparing the vapour pressures reflecting the vapour pressure equilibrium lines in Figure S2 and Figure 9. The phases in equilibrium will have the same vapour pressure, whether they are the most stable phases or not. In the case of the I-III-v triple point, because its temperature is very high, the vapour pressure for the solid phases is in the order of MPa. The most stable phase may appear to be the liquid phase with 0.3 MPa, however, it should not be forgotten that atmospheric pressure is 0.1 MPa, which implies that even the liquid is not stable anymore at this temperature. The pressures at the other triple points involving the vapour phase are very low in terms of MPa. The most stable phase always has the lowest vapour pressure.

**Table S9. Vapour pressures of individual phases at triple points <sup>a</sup>**

| Triple point | $P_I$ /Pa           | $P_{II}$ /Pa        | $P_{III}$ /Pa       | $P_I$ /Pa           |
|--------------|---------------------|---------------------|---------------------|---------------------|
| II-I-v (1)   | 100                 | 95                  | 102                 | 95                  |
| I-I-v (2)    | 83                  | 79                  | 86                  | 83                  |
| III-I-v (3)  | 76                  | 73                  | 78                  | 78                  |
| I-II-v (7)   | 2.4                 | 2.4                 | 2.5                 | 6.8                 |
| III-II-v (8) | 0.011               | 0.012               | 0.012               | 0.15                |
| I-III-v      | 7.4×10 <sup>6</sup> | 6.4×10 <sup>6</sup> | 7.4×10 <sup>6</sup> | 0.3×10 <sup>6</sup> |

<sup>a</sup> The numbers in parentheses correspond to the triple points in Figure S2 below.

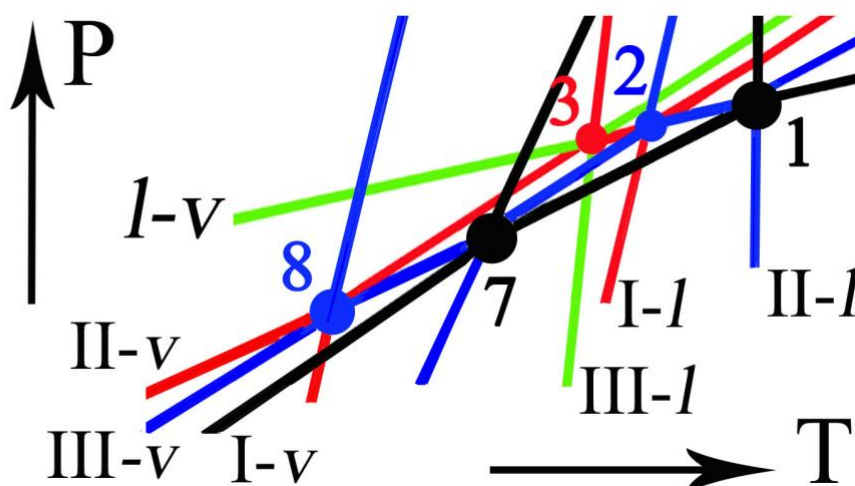

**Figure S2.** Schematic close-up of the melting and vapour equilibria in the pressure temperature phase diagram of benzocaine including the vapour equilibria. Solid black line, black circle: stable, blue line/circle: metastable, red line/circle: supermetastable, green line: hypermetastable.
